# Supplementary material
Source: publisher site journal article supplement (https://www.dovepress.com/article/325701)
Supplement: Supplementary file 1 [file get_supplementary_file.php]

**Supplementary materials 1: Experimental Details**

***Western blot***

For western blot assessment, proteins were extracted using the radio-immunoprecipitation assay (RIPA) buffer and quantitatively detected using the Bradford method. Samples containing the same amount of protein (20 µg) were separated using 10% or 8% sodium dodecyl sulphate-polyacrylamide gel electrophoresis (SDS-PAGE). Then, the proteins were transferred onto polyvinylidene fluoride (PVDF) membranes and blocked with 5% skimmed milk for 1 h at room temperature. After washing with 1X TBS-0.1% Tween-20 buffer, the membranes were incubated with specific primary antibodies at 4˚C overnight. The following day, the membranes were rinsed and incubated with the corresponding secondary antibodies. The specific primary antibodies used were anti-DZIP1 (Invitrogen, USA. Lot: VL3141131A), anti-DZIP1L (Abcam, UK. Lot: GR3363469), anti-DZIP3 (Invitrogen, USA. Lot: RF2219922), and anti-β-actin (Invitrogen, USA. Lot: RI2265993). Primary (1:1,000) and secondary antibodies obtained from Zhongshan Golden Bridge Biotechnology (Beijing, China. Lot: 205001014, 203700821) (1:5,000) were added for the binding reaction. Exposure was detected using a gel image processing system (ChemiDoc XRS+) to analyze the target/β-actin bands, and the relative amounts of protein were calculated.

***Immunohistochemistry (IHC)***

Tissues slides were deparaffinized, rehydrated, and then heated with citric acid buffer for antigenic retrieval. After cooling at room temperature, the sections were submerged into 0.3% hydrogen peroxide for 15 minutes to block endogenous peroxidase activity. After washing in phosphate‐buffered saline (PBS) for 5 minutes, sections were blocked with 5% bovine serum albumin at room temperature for 1 hour. The tissues were incubated with the indicated primary antibodies in a humidified chamber at 4°C overnight. After several washes, horseradish peroxidase (HRP)‐labeled goat anti-mouse or goat anti‐rabbit secondary antibodies were added, and sections were incubated for 50 minutes at room temperature. Hematoxylin was used to counterstain the slides; subsequently, the slides were dehydrated and covered with coverslips. The primary antibodies were the same as those used for western blot, and the concentrations were as follows: anti-DZIP1 (1:500), anti-DZIP1L (1:500), and anti-DZIP3 (1:500).

The intensity (weak, moderate, or strong) and extent of staining (proportion of positive cells) was graded using the Histochemistry score (H-SCORE) by two independent observers. The images were captured with a NIKON Eclipse Ni-E microscope (original magnification, ×400). The H-SCORE (range 0–300, higher scores indicating stronger positive staining) was calculated as follows:

H-SCORE=∑ (PI × I) = (percentage of cells showing weak intensity of staining ×1) + (percentage of cells showing moderate intensity of staining ×2) + (percentage of cells showing strong intensity of staining ×3).
